# Supplementary figures and images for: High Flux and Antifouling Nanofiltration Membrane Modified by Ag@UiO-66-NH2 and Its Application for Biphenol A Removal
Source: Hindawi journal article supplement (doi:10.1155/2022/4197365), 2022-01-22

**Graphic Abstract：**


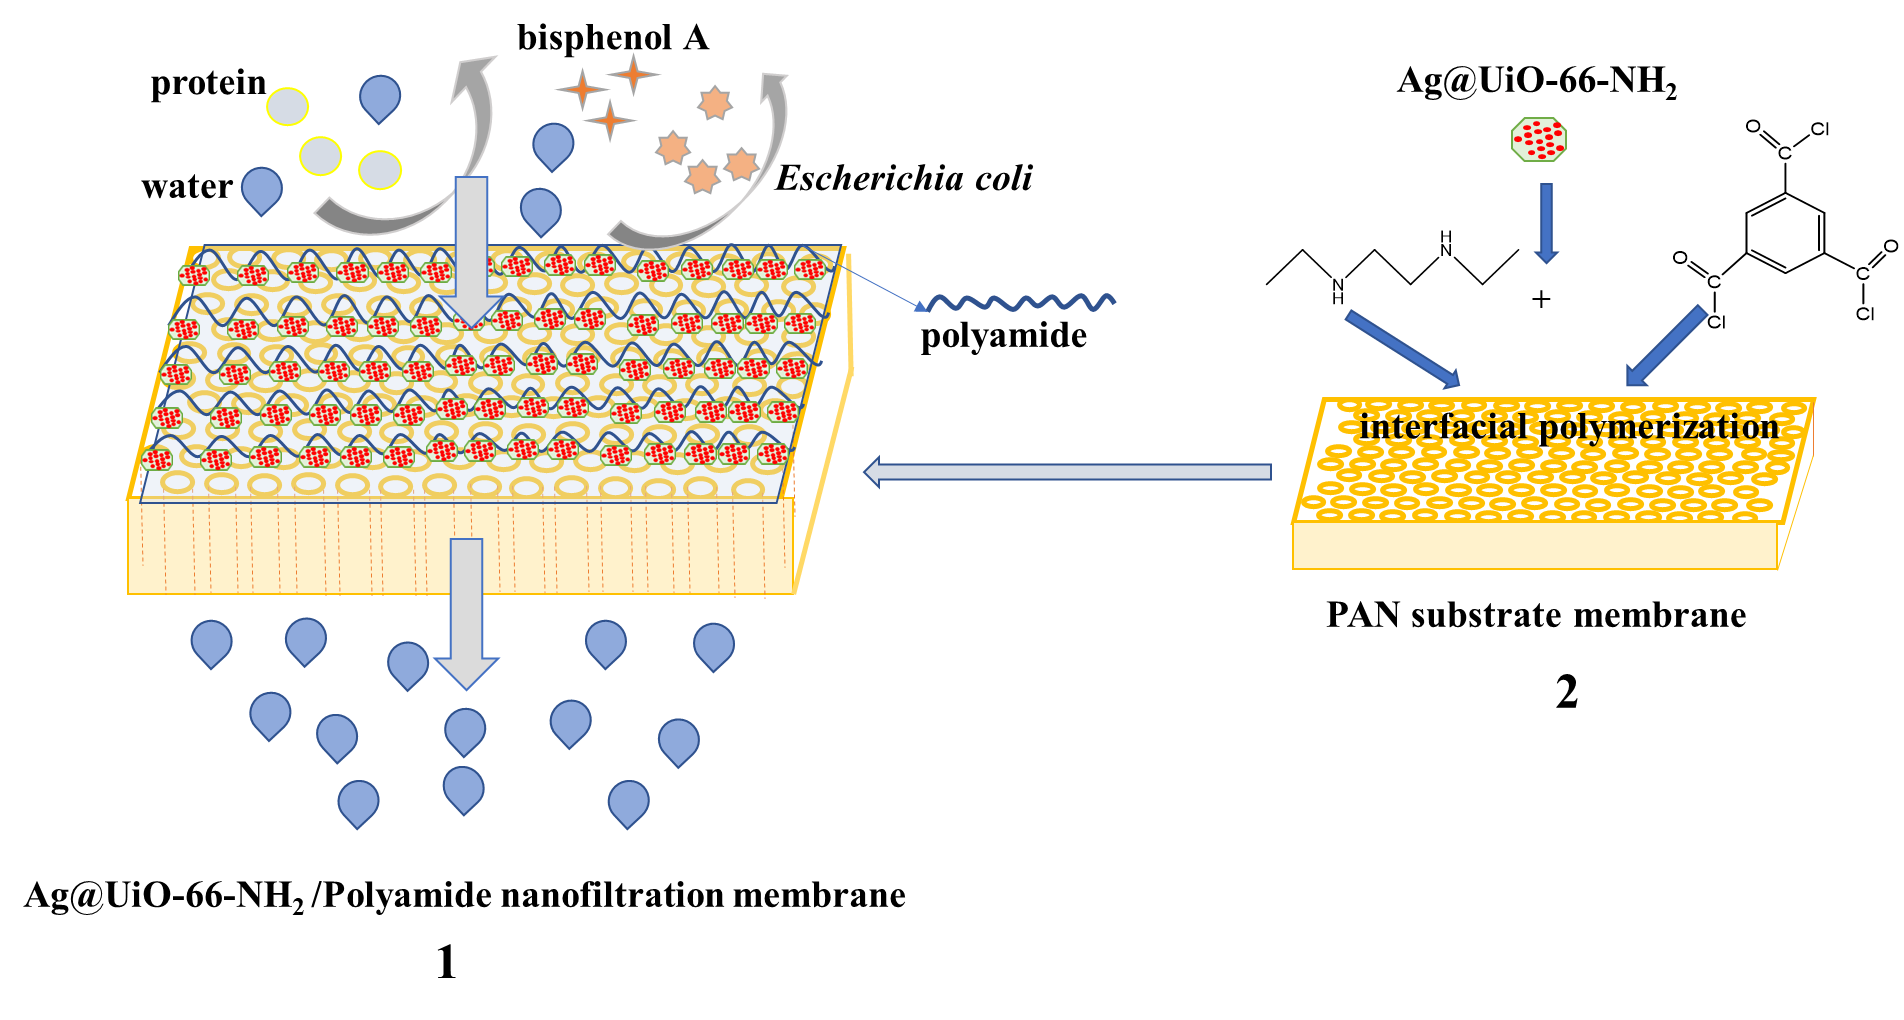

Supplement: f1 [file 4197365.f1.docx]
